# Supplementary material
Source: PubMed Central journal article supplement (PMC7047721)
Supplement: NIHMS1540340-supplement-Supp1.pdf [file NIHMS1540340-supplement-Supp1.pdf]

## Supporting Information

### **Improved Contacts to p-Type MoS<sub>2</sub> Transistors by Charge-Transfer Doping and Contact Engineering**

*Siyuan Zhang,\* Son T. Le, Curt A. Richter, Christina A. Hacker\**

Dr. S. Zhang, Dr. S. T. Le  
Theiss Research, La Jolla, CA 92037, USA  
E-mail: siyuan.zhang@nist.gov

Dr. S. Zhang, Dr. S. T. Le, Dr. C. A. Richter, Dr. C. A. Hacker  
Physical Measurement Laboratory, National Institute of Standards and Technology (NIST)  
Gaithersburg, MD 20899, USA  
E-mail: christina.hacker@nist.gov

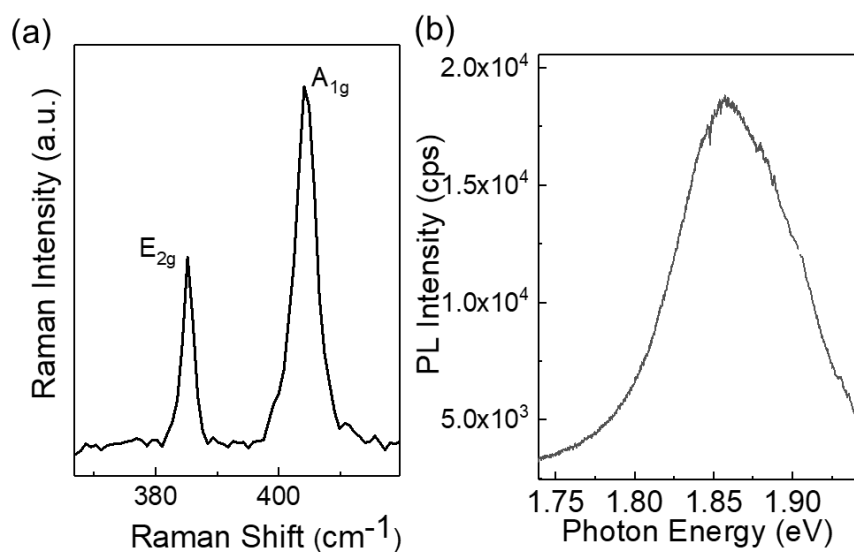

Figure S1. Characterization of the MoS<sub>2</sub> layer thickness. (a) Raman spectrum of MoS<sub>2</sub> used in this study. The A<sub>1g</sub> and E<sub>2g</sub> peak frequencies of 404.1 cm<sup>-1</sup> and 385.0 cm<sup>-1</sup> confirm it is monolayer.<sup>1</sup> (b) PL spectrum of the monolayer MoS<sub>2</sub>.

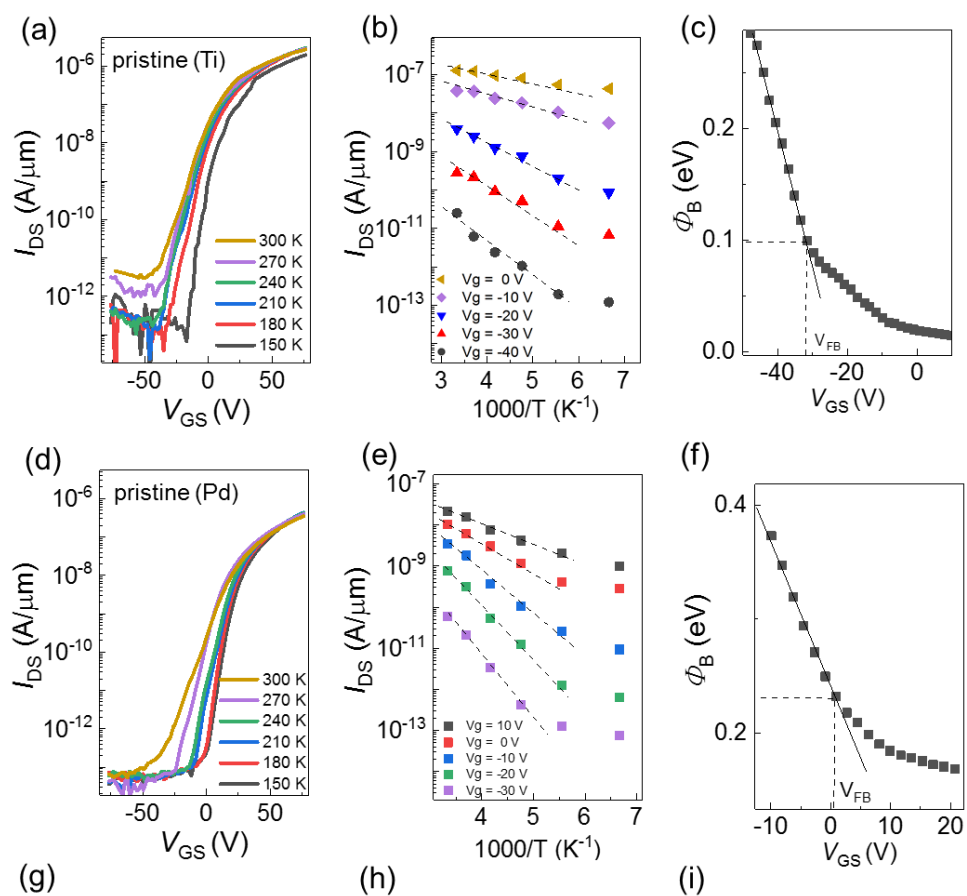

**Figure S2. Schottky barrier extraction.** For pristine MoS<sub>2</sub> transistor with Ti contacts: (a) experimental transfer characteristics at different operating temperature; (b) Arrhenius-type plot constructed at different gate voltages; (c) extracted Schottky barrier height as a function of applied gate voltages. For pristine MoS<sub>2</sub> transistor with Pd contacts: (a) experimental transfer characteristics at different operating temperature; (b) Arrhenius-type plot constructed at different gate voltages; (c) extracted Schottky barrier height as a function of applied gate voltages. The bias voltage fixed at 5 V and the channel length is 5  $\mu\text{m}$ .

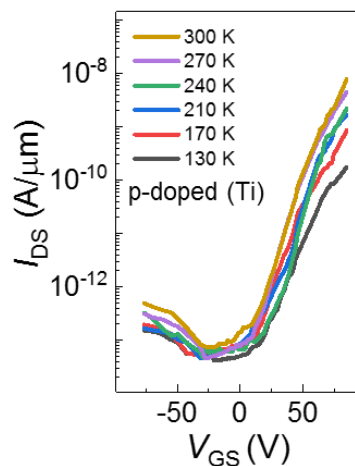

**Figure S3** Experimental transfer characteristics for p-doped MoS<sub>2</sub> transistor with Ti contacts at different operating temperature. The tunneling regime was not observed.

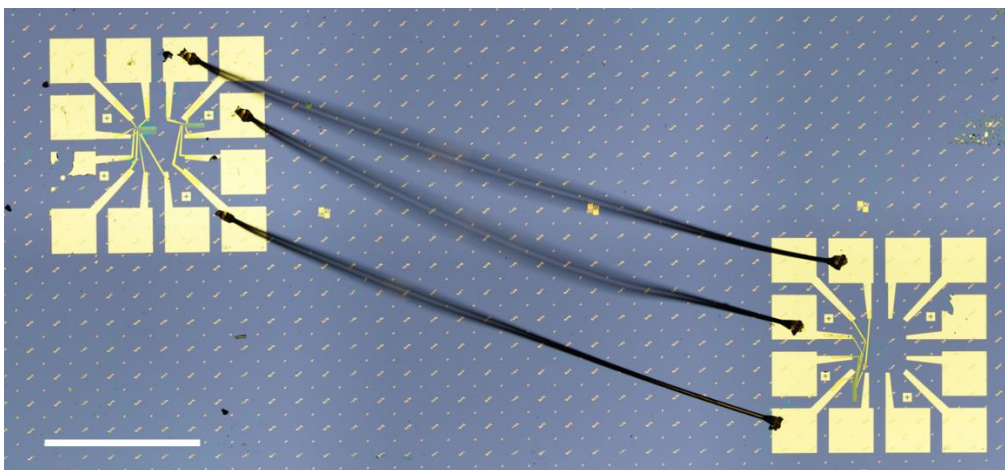

**Figure S4.** Optical image of the MoS<sub>2</sub> inverter (scale bar is 1 mm). n-FETs and p-FETs were connected through wire-bonding.

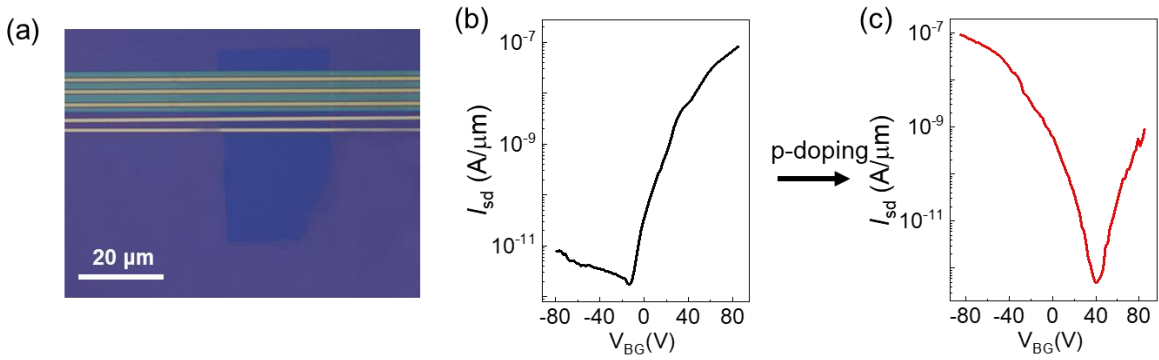

**Figure S5.** (a) Optical image of the initial design of the inverter. The n-FETs were protected by 100 nm SiO<sub>2</sub>. (b) The transfer characteristics of a pristine MoS<sub>2</sub> FET covered by 100 nm SiO<sub>2</sub>. (c) The same transistor after 10 min p-doping.  $V_{DS} = 5$  V. The channel length  $L$  is 3  $\mu\text{m}$ . The protected transistor showed p-doping effects after 10 min treatment. These data suggest that the dopants can diffuse beneath the SiO<sub>2</sub> layer.

**Reference**

1. H. Li, Q. Zhang, C. C. R. Yap, B. K. Tay, T. H. T. Edwin, A. Olivier and D. Baillargeat, *Adv. Funct. Mater.* **22** (7), 1385-1390 (2012).
